# Supplementary material for: A Computational Model for the Automatic Diagnosis of Attention Deficit Hyperactivity Disorder Based on Functional Brain Volume
Source: PubMed Central journal article supplement (PMC5596085; doi:10.3389/fncom.2017.00075), 2017-09-08
Supplement: Image1.pdf [file Image1.pdf]

**Figure S1.** Correlation between head movements and functional volumes.

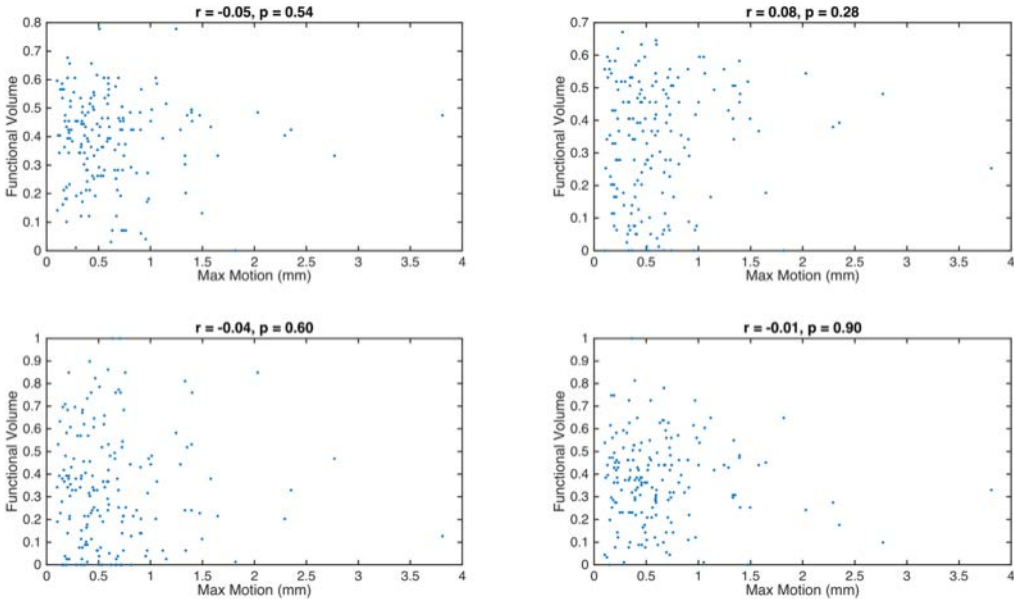

3  
4
