# Supplementary material for: A Computational Model for the Automatic Diagnosis of Attention Deficit Hyperactivity Disorder Based on Functional Brain Volume
Source: PubMed Central journal article supplement (PMC5596085; doi:10.3389/fncom.2017.00075), 2017-09-08
Supplement: Table1.pdf [file Table1.pdf]

**Table S1.** Classification performance on dataset from Oregon Health & Science University (OHSU)

| features      | with feature selection | sens.(%) | spec.(%)  | accu.(%) | AUC       | (sens+spec)/2(%) |
|---------------|------------------------|----------|-----------|----------|-----------|------------------|
| Demo          | No                     | 0.0±0.0  | 100.0±0.0 | 50.0±0.0 | 0.56±0.03 | 50.0±0.0         |
| Sato's method | No                     | 43.7±3.6 | 73.7±3.2  | 63.5±2.6 | 0.63±0.03 | 58.7±2.6         |
| fALFF1        | No                     | 45.3±4.8 | 76.4±2.6  | 65.9±2.6 | 0.65±0.03 | 60.9±3.0         |
| FV+Demo       | Yes                    | 45.9±4.1 | 86.5±2.6  | 72.7±2.8 | 0.68±0.02 | 66.2±3.1         |
| fALFF1+Demo   | Yes                    | 50.2±4.0 | 88.9±3.1  | 75.7±2.8 | 0.72±0.03 | 69.5±2.9         |
| fALFF2+Demo   | Yes                    | 35.3±3.4 | 92.9±1.6  | 73.3±1.5 | 0.71±0.02 | 64.1±1.8         |
