# Supplementary material for: A Computational Model for the Automatic Diagnosis of Attention Deficit Hyperactivity Disorder Based on Functional Brain Volume
Source: PubMed Central journal article supplement (PMC5596085; doi:10.3389/fncom.2017.00075), 2017-09-08
Supplement: Table2.pdf [file Table2.pdf]

**Table S2.** Classification performance of anatomical volume using AAL atlas without feature selection

| features | sens. (%)       | spec. (%)       | accu. (%)       | AUC              | (sens+spec)/2 (%) |
|----------|-----------------|-----------------|-----------------|------------------|-------------------|
| GM       | <b>70.3±2.7</b> | 42.4±2.5        | 57.6±1.7        | 0.57±0.01        | 56.4±1.7          |
| WM       | 66.4±2.3        | 44.2±2.9        | 56.3±2.0        | 0.56±0.02        | 55.3±2.1          |
| CSF      | 67.3±2.2        | 34.5±2.4        | 52.3±1.6        | 0.54±0.02        | 50.9±1.6          |
| GM+Demo  | 67.1±2.0        | 49.6±2.1        | 59.1±1.5        | <b>0.65±0.01</b> | 58.3±1.5          |
| WM+Demo  | 65.5±1.7        | <b>52.9±2.7</b> | 59.8±1.9        | 0.63±0.01        | 59.2±1.9          |
| CSF+Demo | 67.1±2.6        | 51.9±2.9        | <b>60.2±2.5</b> | 0.64±0.02        | <b>59.5±2.5</b>   |
