# Supplementary material for: A Computational Model for the Automatic Diagnosis of Attention Deficit Hyperactivity Disorder Based on Functional Brain Volume
Source: PubMed Central journal article supplement (PMC5596085; doi:10.3389/fncom.2017.00075), 2017-09-08
Supplement: Table3.pdf [file Table3.pdf]

**Table S3.** Classification performance of anatomical volume using AAL atlas with feature selection

| features | sens. (%)       | spec. (%)       | accu. (%)       | AUC              | (sens+spec)/2 (%) |
|----------|-----------------|-----------------|-----------------|------------------|-------------------|
| GM+Demo  | <b>67.8±1.9</b> | 49.9±2.5        | 59.7±1.7        | <b>0.65±0.01</b> | 58.9±1.7          |
| WM+Demo  | 66.0±2.6        | <b>53.0±2.6</b> | 60.0±2.1        | 0.64±0.01        | 59.5±2.1          |
| CSF+Demo | 67.2±2.1        | 52.4±2.7        | <b>60.4±2.1</b> | 0.63±0.02        | <b>59.8±2.1</b>   |
